# Supplementary material
Source: publisher figshare collection journal article supplement (https://karger.figshare.com/ndownloader/files/14057792)
Supplement: Supplementary file 1 [file 14057792]

Online suppl. Table 2: Frequencies of copy-number gains and amplifications of receptor tyrosine kinases and representative growth-related genes on chromosome 7 in clusters A and B.

| Name of Gene                                        | Copy-number gain |           |               | Amplification |           |               |               |
|-----------------------------------------------------|------------------|-----------|---------------|---------------|-----------|---------------|---------------|
|                                                     | Cluster A        | Cluster B | p value       | Cluster A     | Cluster B | p value       |               |
|                                                     | (n = 51 )        | (n = 55 ) |               | (n = 51 )     | (n = 55 ) |               |               |
| AATK                                                | 8                | 13        | 0.3388        | 1             | 0         | 0.4811        |               |
| ALK                                                 | 6                | 4         | 0.516         | 0             | 0         | 1             |               |
| AXL                                                 | 15               | 3         | <b>0.0014</b> | 1             | 0         | 0.4811        |               |
| CSF1R                                               | 10               | 12        | 0.8148        | 0             | 1         | 1             |               |
| DDR1                                                | 20               | 19        | 0.6887        | 3             | 3         | 1             |               |
| DDR2                                                | 16               | 19        | 0.8368        | 2             | 0         | 0.2291        |               |
| FGFR1                                               | 13               | 12        | 0.8193        | 2             | 1         | 0.6074        |               |
| FGFR2                                               | 5                | 12        | 0.1155        | 0             | 1         | 1             |               |
| FGFR3                                               | 21               | 17        | 0.314         | 8             | 4         | 0.2249        |               |
| FGFR4                                               | 17               | 8         | <b>0.0381</b> | 3             | 1         | 0.3495        |               |
| FLT1(VEGFR1)                                        | 25               | 19        | 0.168         | 5             | 1         | 0.1033        |               |
| FLT3                                                | 16               | 23        | 0.3158        | 3             | 0         | 0.1079        |               |
| FLT4 (VEGFR3)                                       | 19               | 14        | 0.2131        | 1             | 0         | 0.4811        |               |
| IGF1R                                               | 16               | 6         | <b>0.0154</b> | 2             | 0         | 0.2291        |               |
| INSR                                                | 3                | 2         | 0.6699        | 0             | 0         | 1             |               |
| INSRR                                               | N/A              | N/A       | N/A           | N/A           | N/A       | N/A           |               |
| KDR (VEGFR2)                                        | 4                | 2         | 0.4248        | 1             | 0         | 0.811         |               |
| KIT                                                 | 6                | 3         | 0.3075        | 1             | 0         | 0.4811        |               |
| LMTK2                                               | 29               | 15        | <b>0.003</b>  | 7             | 0         | <b>0.0048</b> |               |
| LMTK3                                               | N/A              | N/A       | N/A           | N/A           | N/A       | N/A           |               |
| LTK                                                 | N/A              | N/A       | N/A           | N/A           | N/A       | N/A           |               |
| MERTK                                               | 14               | 12        | 0.6519        | 0             | 1         | 1             |               |
| MET                                                 | 18               | 11        | 0.0861        | 0             | 1         | 1             |               |
| MST1R                                               | 17               | 7         | <b>0.0191</b> | 1             | 0         | 0.4811        |               |
| MUSK                                                | 13               | 9         | 0.3382        | 0             | 0         | 1             |               |
| NTRK1                                               | 13               | 17        | 0.6667        | 1             | 1         | 1             |               |
| NTRK2                                               | 9                | 7         | 0.5901        | 0             | 0         | 1             |               |
| NTRK3                                               | 14               | 4         | <b>0.0086</b> | 0             | 0         | 1             |               |
| PDGFRA                                              | 4                | 3         | 0.7086        | 0             | 0         | 1             |               |
| PDGFRB                                              | 7                | 8         | 1             | 0             | 0         | 1             |               |
| PTK7                                                | 22               | 21        | 0.6932        | 13            | 10        | 0.48          |               |
| RET                                                 | 19               | 19        | 0.8405        | 2             | 7         | 0.1636        |               |
| ROR1                                                | 5                | 6         | 1             | 0             | 0         | 1             |               |
| ROR2                                                | 7                | 3         | 0.1905        | 0             | 0         | 1             |               |
| ROS1                                                | 10               | 2         | <b>0.0129</b> | 0             | 0         | 1             |               |
| RYK                                                 | 9                | 3         | 0.0661        | 0             | 0         | 1             |               |
| STYK1                                               | 29               | 20        | 0.0508        | 8             | 3         | 0.114         |               |
| TEK                                                 | 3                | 3         | 1             | 0             | 0         | 1             |               |
| TIE1                                                | 13               | 22        | 0.1484        | 5             | 2         | 0.2575        |               |
| TYRO3                                               | 17               | 15        | 0.5313        | 1             | 1         | 1             |               |
| EPHA1                                               | 6                | 7         | 1             | 0             | 0         | 1             |               |
| EPHA2                                               | 16               | 14        | 0.5248        | 0             | 0         | 1             |               |
| EPHA3                                               | 14               | 4         | <b>0.0086</b> | 0             | 0         | 1             |               |
| EPHA4                                               | 9                | 5         | 0.2544        | 0             | 0         | 1             |               |
| EPHA5                                               | 3                | 8         | 0.2052        | 0             | 0         | 1             |               |
| EPHA6                                               | 6                | 5         | 0.755         | 0             | 0         | 1             |               |
| EPHA7                                               | 3                | 2         | 0.6699        | 0             | 0         | 1             |               |
| EPHA8                                               | 6                | 12        | 0.2018        | 2             | 0         | 0.2291        |               |
| EPHA10                                              | 26               | 29        | 1             | 11            | 14        | 0.6554        |               |
| EPHB1                                               | 9                | 5         | 0.2544        | 0             | 0         | 1             |               |
| EPHB2                                               | 21               | 24        | 0.8457        | 2             | 1         | 0.6074        |               |
| EPHB3                                               | 24               | 15        | <b>0.0444</b> | 8             | 2         | <b>0.0464</b> |               |
| EPHB4                                               | 28               | 20        | 0.0786        | 14            | 5         | <b>0.0212</b> |               |
| EPHB6                                               | 32               | 27        | 0.1755        | 14            | 7         | 0.0867        |               |
| EGFR                                                | 20               | 7         | <b>0.0033</b> | 6             | 1         | 0.0537        |               |
| ERBB2                                               | 28               | 32        | 0.8449        | 7             | 13        | 0.2219        |               |
| ERBB3                                               | 17               | 8         | <b>0.0381</b> | 7             | 3         | 0.1905        |               |
| ERBB4                                               | 6                | 1         | 0.0537        | 0             | 0         | 1             |               |
| Growth-related genes<br>on chromosome 7 except RTKs | RALA             | 18        | 9             | <b>0.0283</b> | 2         | 0             | 0.2291        |
|                                                     | PTPN12           | 16        | 9             | 0.1079        | 4         | 0             | 0.0503        |
|                                                     | MAFK             | 34        | 25            | <b>0.0328</b> | 23        | 15            | 0.0693        |
|                                                     | ARHGEF5          | 17        | 15            | 0.5313        | 5         | 3             | 0.4772        |
|                                                     | BRAF             | 11        | 9             | 0.6206        | 1         | 0             | 0.4811        |
|                                                     | CAV1             | 12        | 8             | 0.3213        | 1         | 0             | 0.4811        |
|                                                     | GLI3             | 25        | 11            | <b>0.0021</b> | 1         | 0             | 0.4811        |
|                                                     | HOXA1            | 29        | 32            | 1             | 4         | 3             | 0.7086        |
|                                                     | RABL5            | 21        | 13            | 0.063         | 4         | 3             | 0.7086        |
|                                                     | RBM28            | 22        | 21            | 0.6932        | 8         | 7             | 0.7826        |
|                                                     | CUL1             | 31        | 20            | <b>0.0192</b> | 11        | 3             | <b>0.0203</b> |
|                                                     | IGF2BP3          | 25        | 19            | 0.168         | 3         | 2             | 0.6699        |
|                                                     | RELB             | 25        | 17            | 0.0741        | 3         | 0             | 0.1079        |
|                                                     | SEMA3E           | 19        | 7             | <b>0.006</b>  | 1         | 0             | 0.4811        |

p values <0.05 are shown in bold. N/A: not assessable.
